# Supplementary material for: SARS-CoV-2 3CLpro mutations selected in a VSV-based system confer resistance to nirmatrelvir, ensitrelvir, and GC376
Source: PubMed Central journal article supplement (PMC9765458; doi:10.1126/scitranslmed.abq7360), 2022-10-04
Supplement: scitranslmed.abq7360_sm.pdf [file scitranslmed.abq7360_sm.pdf]

Supplementary Materials for  
**SARS-CoV-2 3CL<sup>Pro</sup> mutations selected in a VSV-based system confer resistance to nirmatrelvir, ensitrelvir, and GC376**

Emmanuel Heilmann *et al.*

Corresponding author: Emmanuel Heilmann, Emmanuel.Heilmann@i-med.ac.at

*Sci. Transl. Med.* **0**, eabq7360 (2022)  
DOI: 10.1126/scitranslmed.abq7360

**The PDF file includes:**

Figs. S1 to S11  
Tables S1 to S13  
Legends for data files S1 to S4

**Other Supplementary Material for this manuscript includes the following:**

Data files S1 to S4

## Supplemental Figures and Tables

**A**

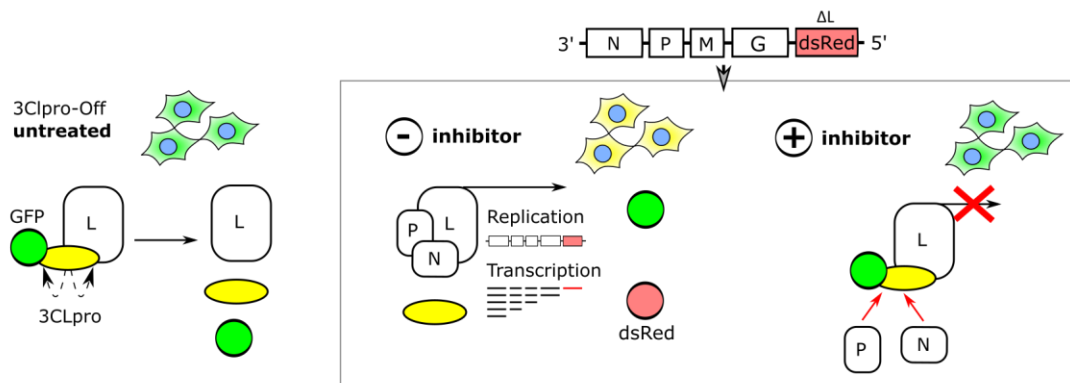

**B**

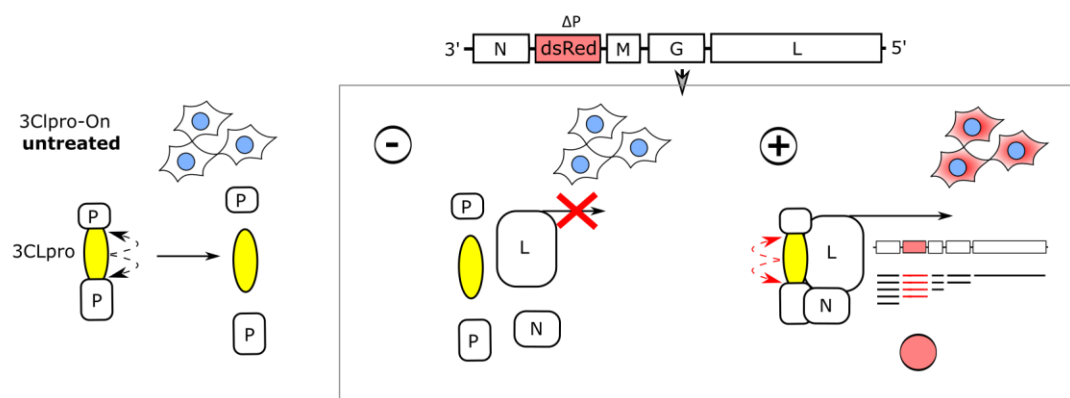

**Fig. S1. Design principles of the 3CL<sup>pro</sup>-Off and -On systems for quantifying 3CL<sup>pro</sup> activity and chemical inhibition.** (A) Schematics of the assay comprising VSV- $\Delta$ L-dsRed and GFP-3CL<sup>pro</sup>-L. Transfection of GFP-3CL<sup>pro</sup>-L plasmid yields GFP-positive cells, and subsequent infection with VSV- $\Delta$ L-dsRed particles yields GFP/dsRed-positive cells (yellow in merge). Addition of a 3CL<sup>pro</sup> inhibitor suppresses the accumulation of dsRed signal (3CL<sup>pro</sup>-Off system). (B) Schematics of the assay comprising VSV- $\Delta$ P-dsRed and P:3CL<sup>pro</sup>. Co-expression of these two vectors in the same cells yields no virus replication due to VSV P protein auto-cleavage by 3CL<sup>pro</sup>. Treatment of these cells with a 3CL<sup>pro</sup> inhibitor restores P protein function and enables virus replication (3CL<sup>pro</sup>-On system).

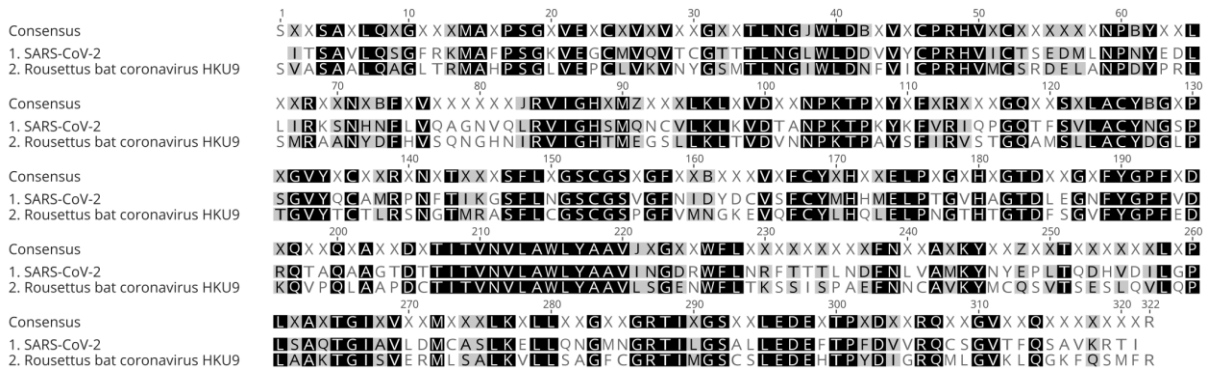

**Fig. S2. Sequence identity of SARS-CoV-2 and MHV 3CL<sup>pro</sup> amino acid sequence.** Multiple Sequence Comparison by Log-Expectation (MUSCLE) sequence alignment of SARS-CoV-2 and mouse hepatitis virus (MHV) 3CL<sup>pro</sup> shows 50% identity of amino acid sequences.

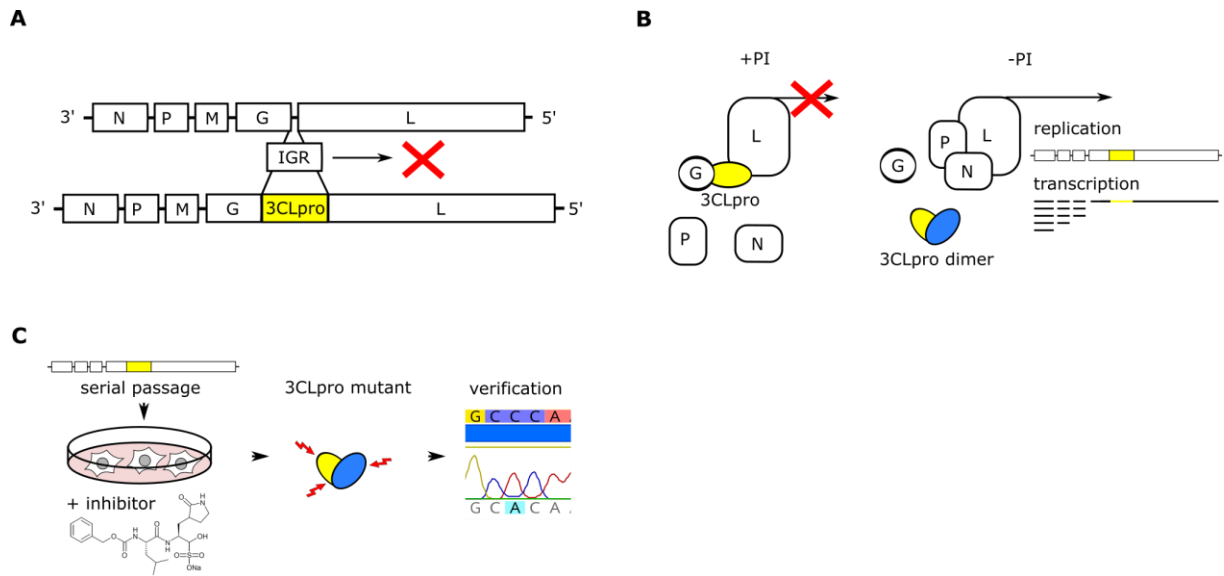

**Fig. S3. Design principles of the VSV-3CL<sup>pro</sup> system for selecting 3CL<sup>pro</sup> mutants.** (A) The genomic scheme of VSV is shown; the intergenic region (IGR) between the glycoprotein (G) and the polymerase (L) was replaced with the SARS-CoV-2 3CL<sup>pro</sup>. (B) Addition of a protease inhibitor (PI) stalls VSV G, 3CL<sup>pro</sup>, and L in a non-functional polyprotein. In the absence of the PI, VSV can replicate and transcribe genes. (C) Serial passage of VSV-G-3CL<sup>pro</sup>-L in the presence of a 3CL<sup>pro</sup> inhibitor can lead to resistance mutations.

**A**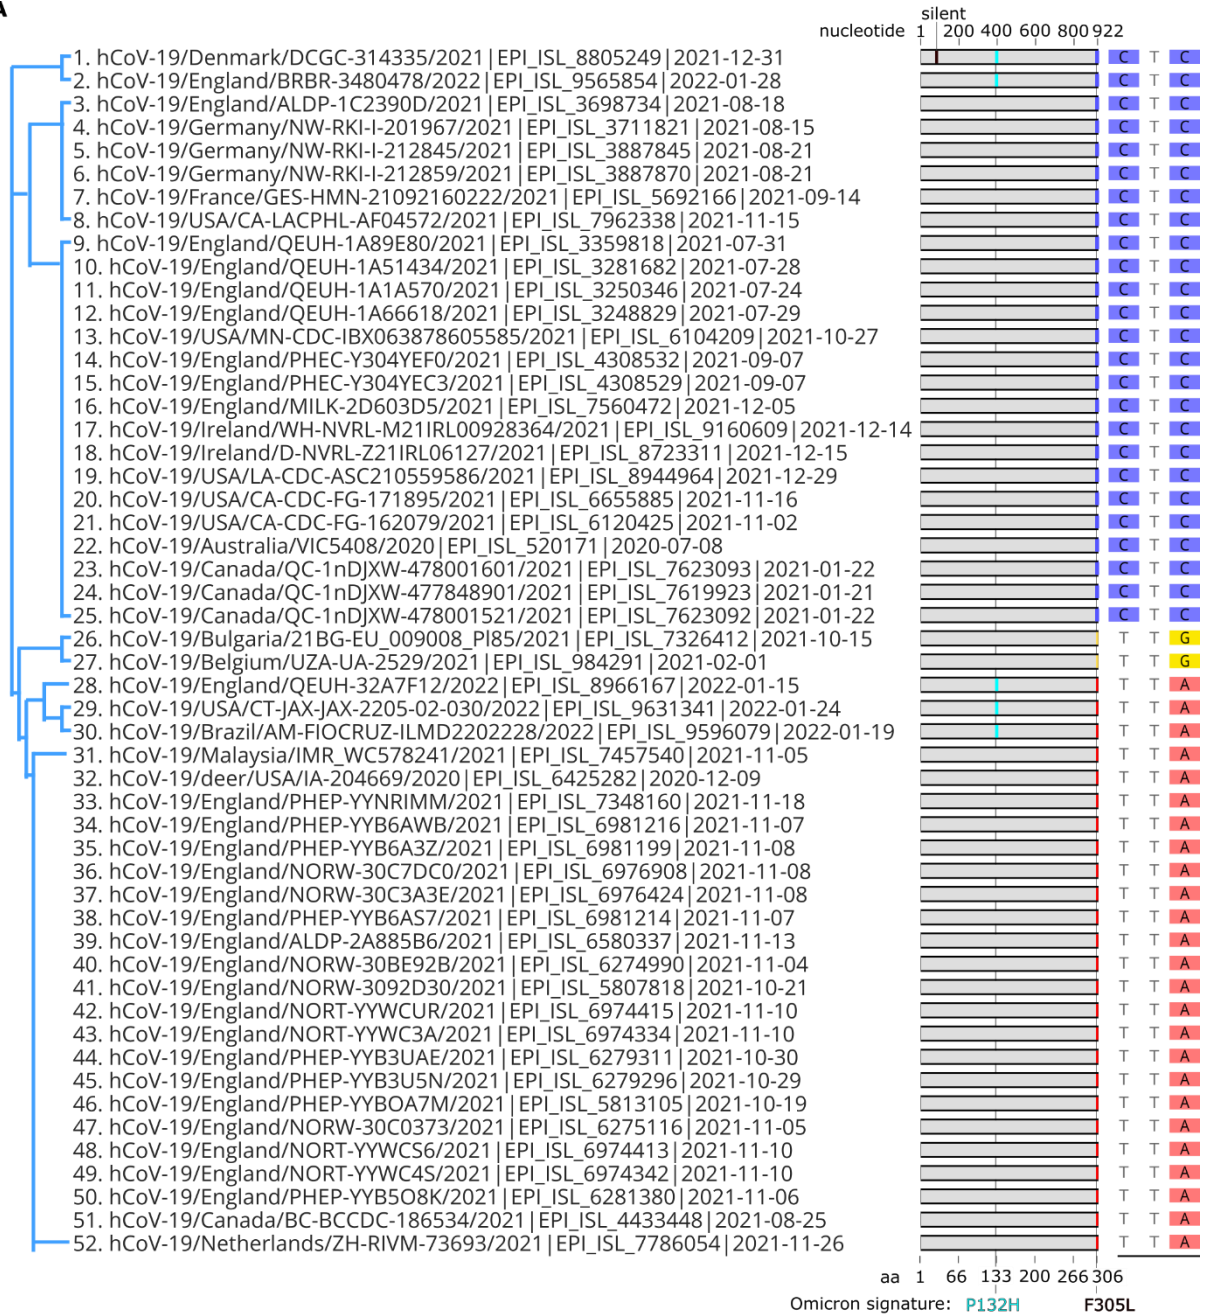**B**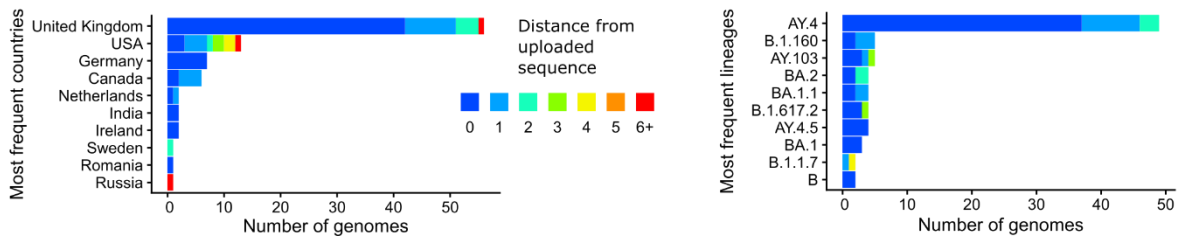

**Fig. S4. Regional outbreaks of SARS-CoV-2-F305L.** (A) An Unweighted Pair Group Method with Arithmetic Mean (UPGMA) tree shows 52 F305L mutant sequences from the global initiative on sharing avian flu data (GISAID) EpiCoV project. Only high-quality sequences (no deletions, insertions, stop codons, or frame shifts) were used for alignment. Turquoise lines indicate Omicron signature mutation, P132H. The column of three nucleotides to the right depict different codons for leucine. (B) GISAID data analysis of all F305L mutants found on July 7<sup>th</sup>, 2022.

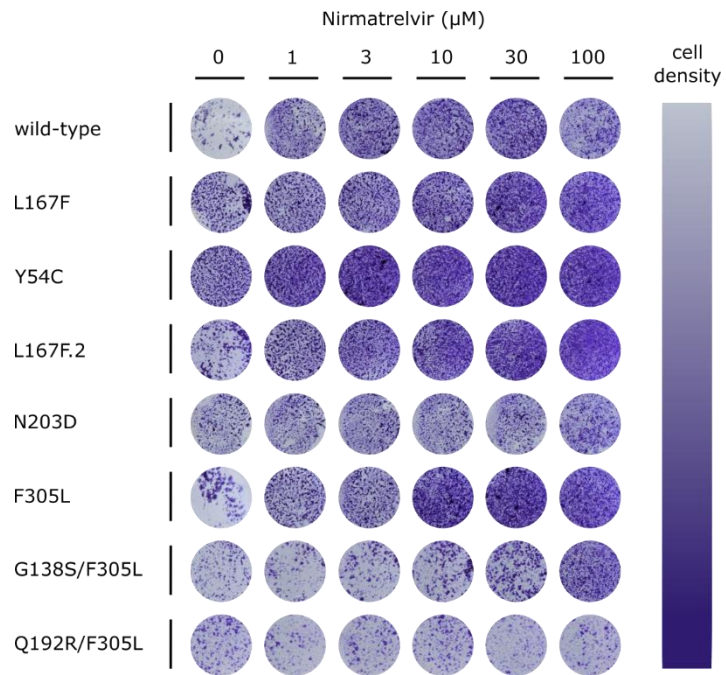

**Fig. S5. Crystal violet staining of dose response experiments.** Cells were stained with crystal violet after removal of supernatant for titration. Lower cell density indicates cytopathic effect.

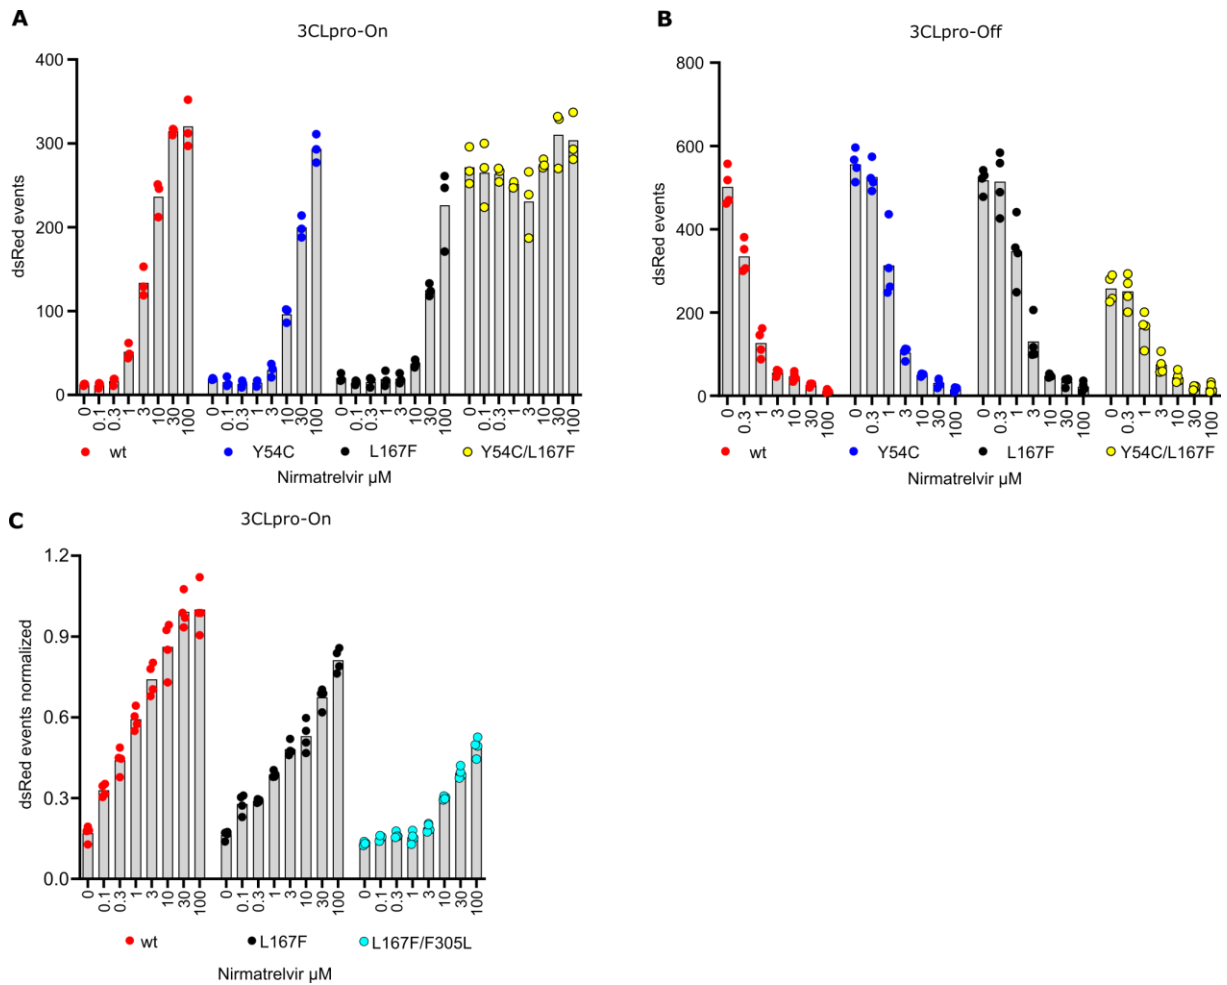

**Fig. S6. Supporting data for re-introduced mutations into 3CL<sup>pro</sup>-On and -Off.** (A) dsRed expression in 3CL<sup>pro</sup>-On wild-type versus Y54C, L167F and Y54C/L167F mutants is shown at increasing concentrations of nirmatrelvir ( $n = 3$  biologically independent replicates per condition with average values represented by histogram bars). (B) dsRed expression in 3CL<sup>pro</sup>-Off wild-type versus Y54C, L167F and Y54C/L167F mutants is shown at increasing concentrations of nirmatrelvir. Values were not normalized ( $n = 4$  biologically independent replicates per condition with average values represented by histogram bars). (C) The dose response experiment from **Fig. 4E** results are shown as measured by flow cytometry. Values were not normalized ( $n = 4$  biologically independent replicates per condition with average values represented by histogram bars).



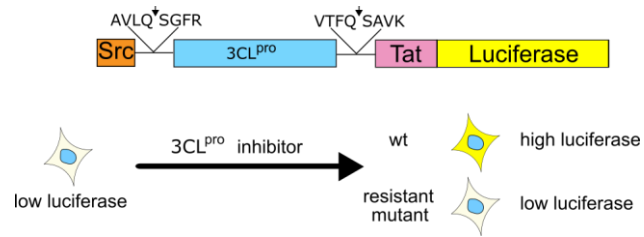

**Fig. S7. Cross validation screening with orthologous cellular assay.** Scheme of cellular gain-of-signal assay based on Src-3CL<sup>pro</sup>-Tat-Luc polyprotein. Adding a 3CL<sup>pro</sup> inhibitor leads to high fluorescence in the wt construct and lower fluorescence in mutant constructs.

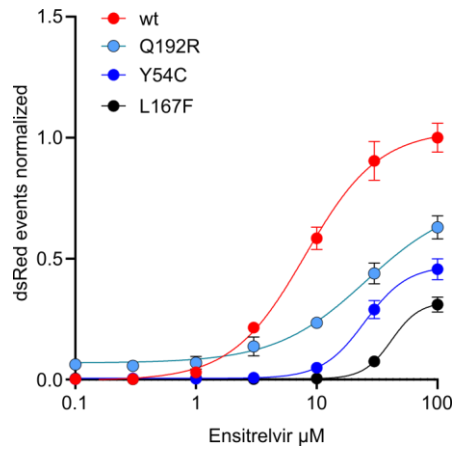

**Fig. S8. Effect of Y54C, L167F and Q192R mutants on inhibition with ensitrelvir.** dsRed expression was measured in 3CL<sup>pro</sup>-On wild-type versus Y54C, L167F and Q192R after exposure to increasing concentrations of ensitrelvir. Data are presented as the standard deviation of n = 4 biologically independent replicates per condition.

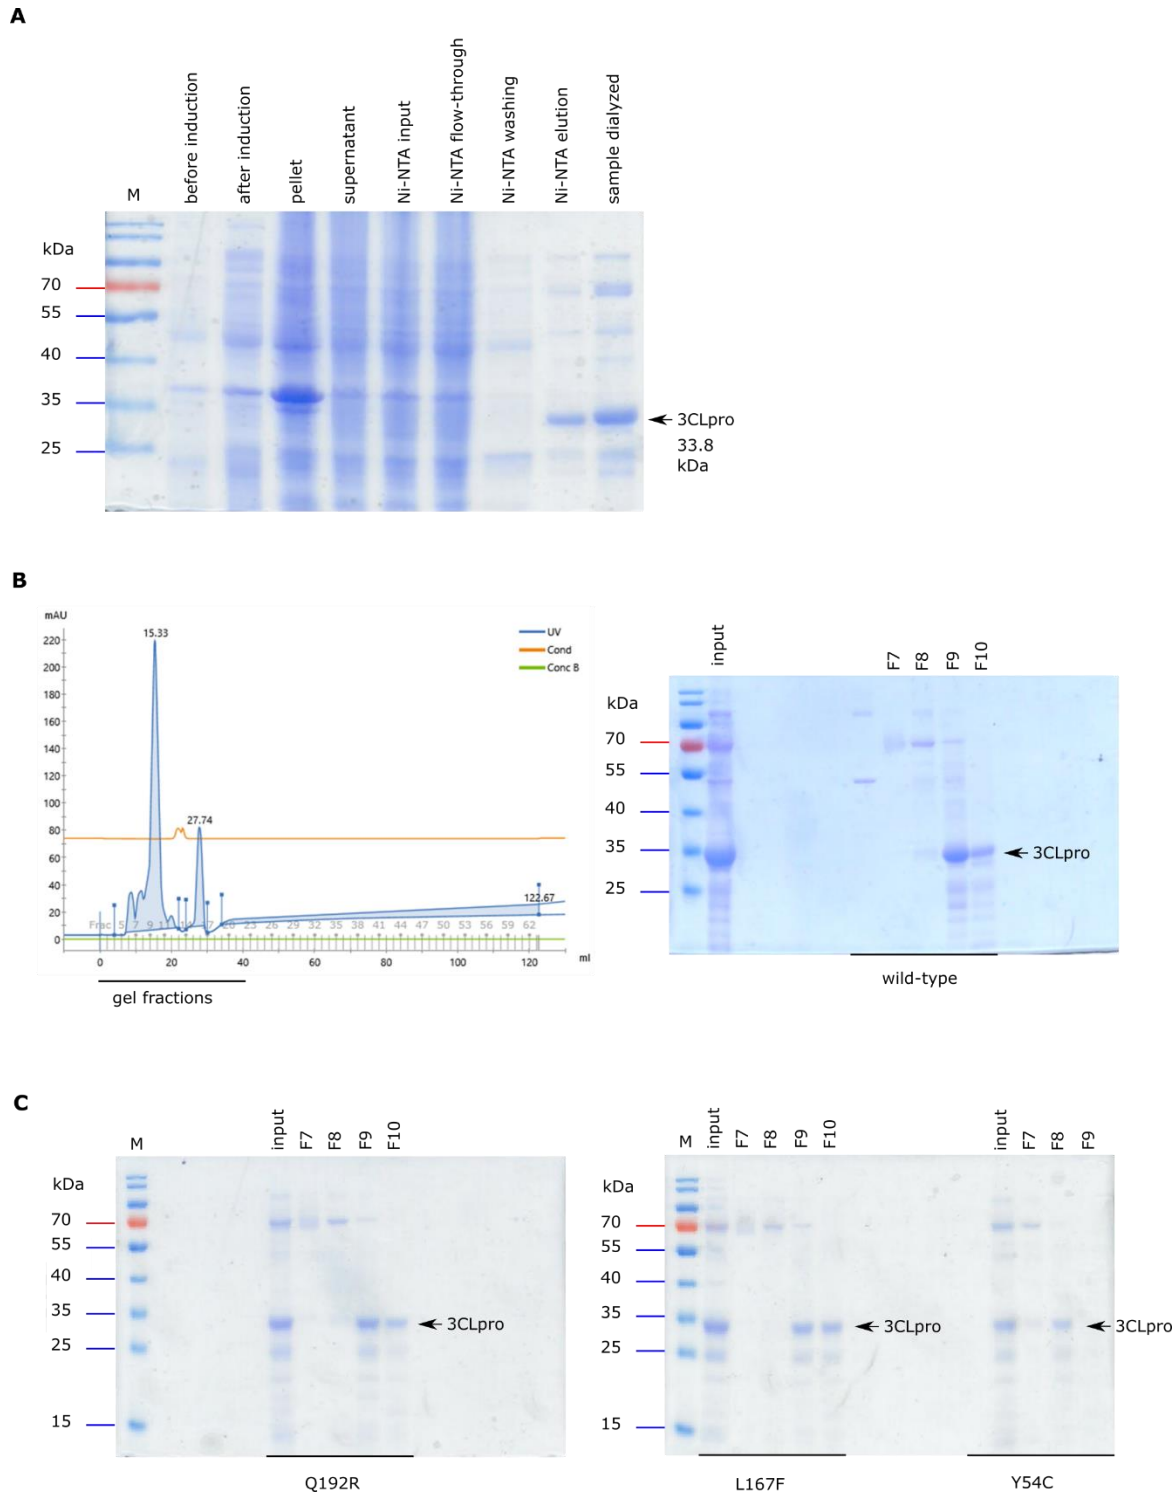

**Fig. S9. 3CL<sup>pro</sup> production quality control.** (A) Different steps of purification are shown. Lane 1 and 2: bacterial lysates before and after induction with Isopropyl  $\beta$ -D-1-thiogalactopyranoside. Lane 3: bacterial pellet. Lane 4: supernatant. Lane 5: resuspended pellet in Ni-NTA buffer. Lane 6: flow-through of Ni-NTA column. Lane 7: Ni-NTA washing flow-through. Lane 8: Ni-TNA elution. Lane 9: dialyzed sample. (B) A chromatogram and a polyacrylamide gel of wild-type 3CL<sup>pro</sup> are shown. Fractions 9 and 10 contained 3CL<sup>pro</sup> (33.8 kDa). UV: absorption at 280 nm; Cond: the conductivity of the liquid; Conc B: baseline / secondary (B) pump flow of FPLC machine. (C) Polyacrylamide gels are shown for mutant 3CL<sup>pro</sup> enzymes.

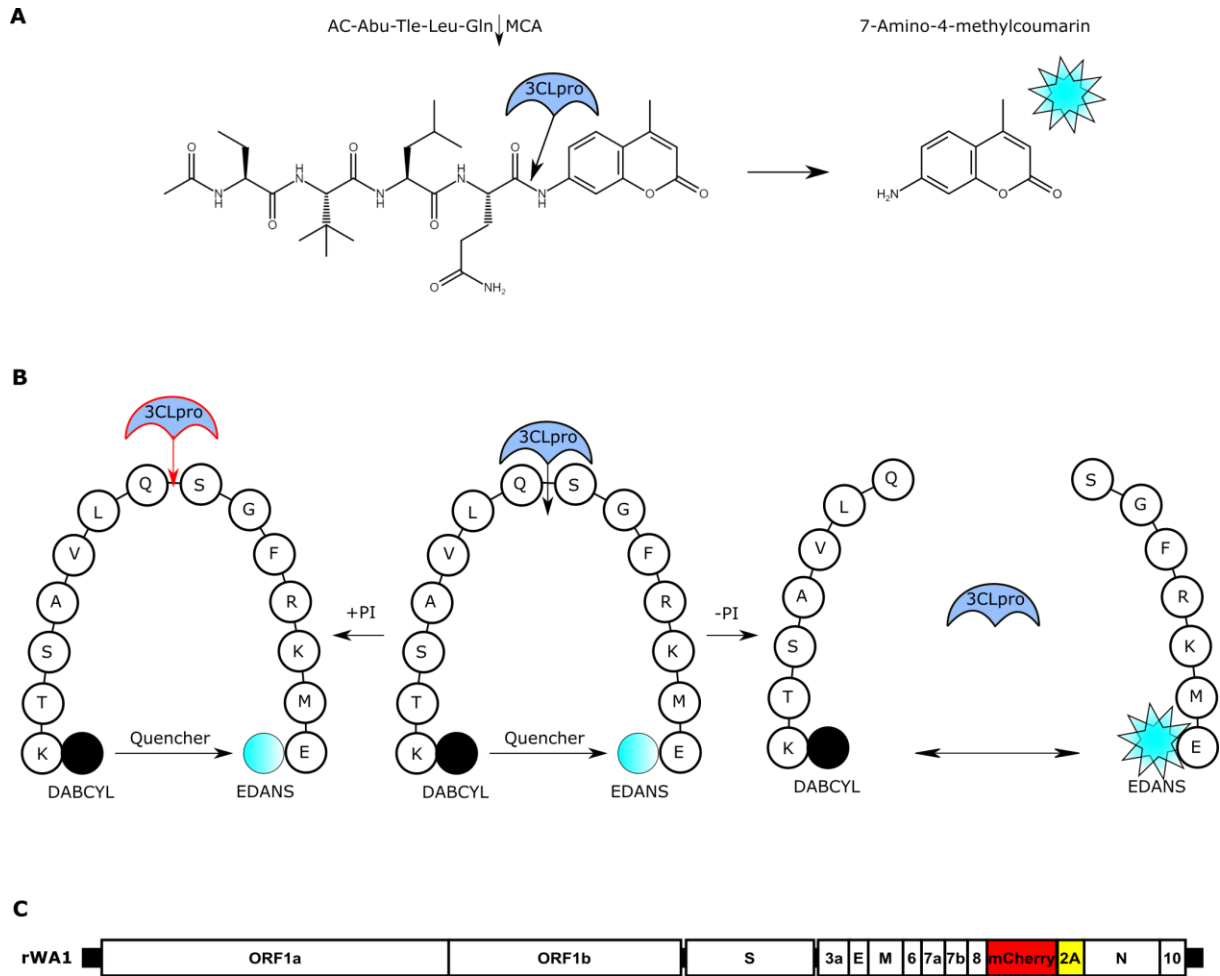

**Fig. S10. Cross validation screenings with biochemical assay and SARS-CoV-2-mCherry.** (A) Scheme of enzymatic assay comprising the substrate Ac-Abu-Tle-Leu-Gln↓MCA. Upon cleavage of 3CL<sup>pro</sup>, the fluorescent molecule 7-amino-4-methylcoumarin (AMC) is released. (B) Scheme of enzymatic assay comprising a quencher (DABCYL), the substrate peptide (KTSAVLQSGFRKME) and fluorogen (EDANS). Upon cleavage of 3CL<sup>pro</sup>, the fluorescent molecule EDANS is released. Addition of protease inhibitor (+PI) leads to sustained quenching of the fluorogen. (C) Genome scheme of rWA1 SARS-CoV-2-mCherry.

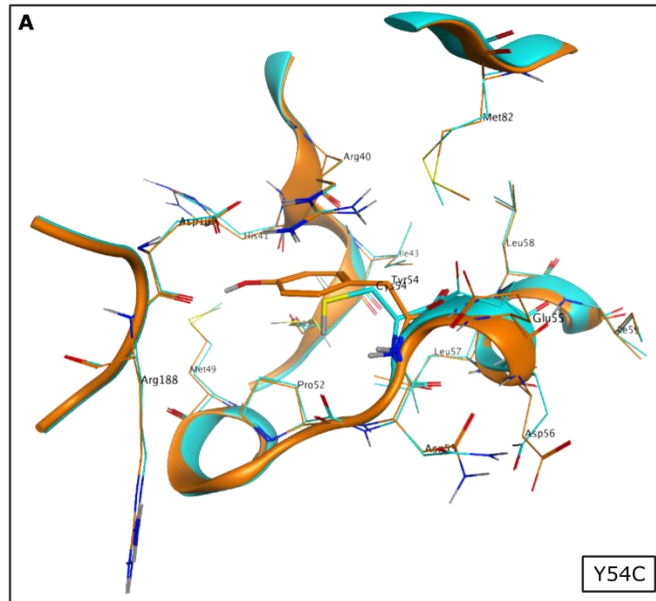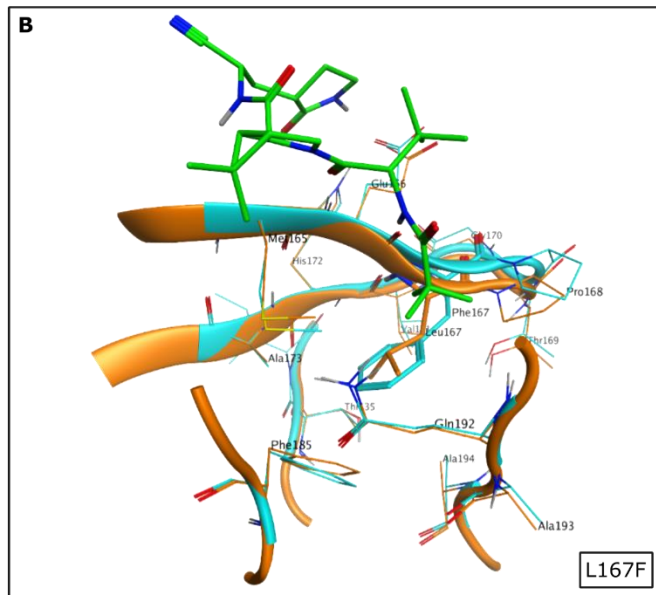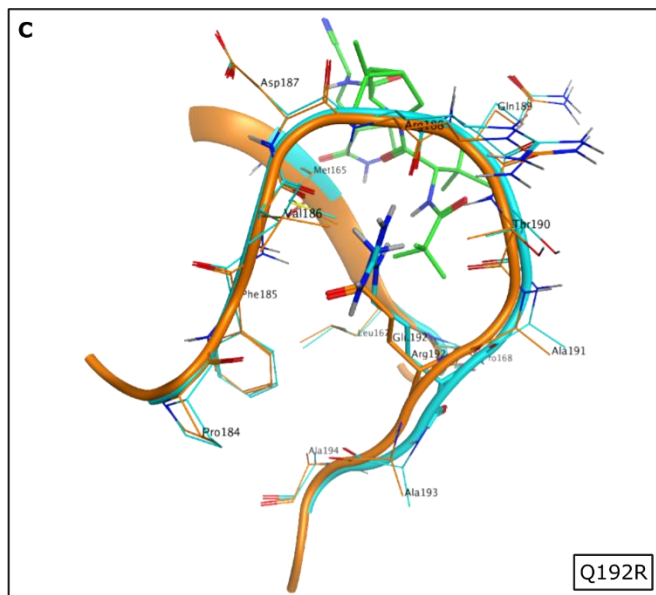

**Fig. S11. In silico resistance mutation scanning with Molecular Operating Environment.** (A) Superposition between the wild-type SARS-CoV-2 3CL<sup>pro</sup> (PDB ID: 7RFW, orange) and the modeled structure for the Y54C mutant (cyan). (B) Superposition between the wild-type SARS-CoV-2 3CL<sup>pro</sup> (PDB ID: 7RFW, orange) and the modeled structure for the L167F mutant (cyan). Nirmatrelvir structure is shown in green. (C) Superposition between the wild-type SARS-CoV-2 3CL<sup>pro</sup> (PDB ID: 7RFW, orange) and the modeled structure for the Q192R mutant (cyan). Nirmatrelvir structure is shown in green

**Table S1: 3CL<sup>pro</sup> mutations derived from VSV-G-3CL<sup>pro</sup>-L virus. GISAID coverage retrieval 2<sup>nd</sup> June 2022, excluding sequences with frame shifts. Numbers in parentheses indicate the number of times the mutants were observed.**

| Passage | Parental | Amino acid change | Localization                                   | NCBI (coverage 3 <sup>rd</sup> March 2022) | GISAID (coverage 2 <sup>nd</sup> June 2022) |
|---------|----------|-------------------|------------------------------------------------|--------------------------------------------|---------------------------------------------|
| 1       | wt       | D216Y             | allosteric                                     | D216N (16)                                 | D216Y (9)                                   |
| 1       | wt       | G2V, D295Y        | cleavage site, allosteric                      | G2C (13)                                   | G2V (9), D295Y (7)                          |
| 1       | F305L    | F3S               | cleavage site                                  | F3V (25)                                   | F3S (3)                                     |
| 1       | wt       | L32I, H80P, D216G | allosteric, allosteric, allosteric             | L32F (78), H80Y (43)                       | L32I (210), H80P (2), D216G (11)            |
| 1       | wt       | L167F             | catalytic site                                 | L167F (89)                                 | L167F (6)                                   |
| 1       | wt       | V204F             | allosteric                                     | V204A (1013), V204I (27), V204G (15)       | V204F (3)                                   |
| 1       | wt       | Y54C              | catalytic site                                 |                                            | Y54C (7)                                    |
| 1       | F305L    | Y54S              | catalytic site                                 |                                            | Y54S (0)                                    |
| 1       | wt       | Q299P             | dimerization interface                         |                                            | -                                           |
| 1       | wt       | Y118H             | allosteric                                     |                                            | Y118H (7)                                   |
| 2       | F305L    | A194S, F219S      | near catalytic site, allosteric                | A194S (55)                                 | A194S (591), F219S (6)                      |
| 2       | F305L    | D197Y             | near catalytic site                            | D197N (14)                                 | D197Y (31)                                  |
| 2       | F305L    | D295G             | allosteric                                     |                                            | D295G (3)                                   |
| 2       | wt       | D295N             | allosteric                                     |                                            | D295N (1)                                   |
| 2       | F305L    | F219S             | allosteric                                     |                                            | F219S (6)                                   |
| 2       | F305L    | G138S             | catalytic site                                 | G138S (14)                                 | G138S (9)                                   |
| 2       | wt       | L208W             | allosteric                                     |                                            | L208W (2)                                   |
| 2,3     | wt       | N203D             | allosteric                                     | N203D (17)                                 | N203D (8)                                   |
| 2       | F305L    | N203H             | allosteric                                     | N203Y (18)                                 | N203H (10)                                  |
| 2       | F305L    | N203K             | allosteric                                     | N203K (11)                                 | N203K (30)                                  |
| 2       | wt       | N203S             | allosteric                                     | N203T (29)                                 | N203S (31)                                  |
| 2       | F305L    | Q192R             | catalytic site                                 |                                            | Q192R (4)                                   |
| 2       | wt       | Q299K             | dimerization interface                         |                                            | Q299K (3)                                   |
| 2       | F305L    | R298G             | dimerization interface                         | R298K (76), R298S (16)                     | R298G (273)                                 |
| 2       | wt       | C128Y, V202F      | dimerization interface, allosteric             |                                            | C128Y (8), V202F (32)                       |
| 2       | F305L    | V296G             | cleavage site                                  | V296I (291)                                | V296G (1)                                   |
| 3       | F305L    | T98I              | allosteric                                     | T98A (10)                                  | T98I (20)                                   |
| 3       | wt       | P99L              | allosteric                                     | P99L (17)                                  | P99L (161)                                  |
| 3       | wt       | Q127R, Q299K      | dimerization interface, dimerization interface |                                            | Q127R (4), Q299K (3)                        |
| 3       | wt       | F305L             | cleavage site                                  | F305L (21)                                 | F305L (101)                                 |
| 3       | F305L    | I200T, N203K      | allosteric                                     | I200N (12), N203K (11)                     | I200T (7), N203K (23)                       |

|   |       |                                |                                                            |                                     |                                                     |
|---|-------|--------------------------------|------------------------------------------------------------|-------------------------------------|-----------------------------------------------------|
| 3 | F305L | V204F                          | allosteric                                                 |                                     | V204F (3)                                           |
| 3 | wt    | G2V, Y126F,<br>D295Y           | cleavage site,<br>dimerization<br>interface,<br>allosteric | G2C (13)                            | G2V (9), Y126F<br>(23), D295Y (7)                   |
| 3 | wt    | D216Y                          | allosteric                                                 |                                     | D216Y (9)                                           |
| 3 | wt    | L141F                          | catalytic site                                             |                                     | L141F (10)                                          |
| 3 | wt    | L32I, H80P,<br>D216G,<br>R222Q | allosteric,<br>allosteric,<br>allosteric,<br>allosteric    | L32F (78), H80Y (43),<br>R222Q (17) | L32I (210), H80P<br>(2), D216G (11),<br>R222Q (384) |

**Table S2: 3CL<sup>pro</sup> amino acid residues in close proximity (within 5 Å) to nirmatrelvir.**

| Amino acid residue | Corresponding mutants |
|--------------------|-----------------------|
| S1                 |                       |
| H41                |                       |
| M49                |                       |
| Y54                | Y54C, S               |
| F140               |                       |
| L141               | L141F                 |
| N142               |                       |
| G143               |                       |
| S144               |                       |
| C145               |                       |
| H163               |                       |
| H164               |                       |
| M165               |                       |
| E166               |                       |
| L167               | L167F                 |
| P168               |                       |
| H172               |                       |
| V186               |                       |
| D187               |                       |
| R188               |                       |
| Q189               |                       |
| T190               |                       |
| A191               |                       |
| Q192               | Q192R                 |



**Table S3: Deposition count in GISAID data base of 3CL<sup>pro</sup> mutations derived from VSV-G-3CL<sup>pro</sup>-L virus before and after 22<sup>nd</sup> December 2021 (retrieval 6<sup>th</sup> June 2022, excluding sequences with frame shifts).**

| <b>Amino acid change</b> | <b>Depositions before Paxlovid<br/>EUA (22<sup>nd</sup> December 2021)</b> | <b>Depositions after Paxlovid EUA</b> |
|--------------------------|----------------------------------------------------------------------------|---------------------------------------|
| D216Y                    | 85                                                                         | 17                                    |
| G2V, D295Y               | 7, 5                                                                       | 5, 2                                  |
| F3S                      | 3                                                                          | -                                     |
| L32I, H80P, D216G        | 177, 3, 8                                                                  | 36, 4, 5                              |
| L167F                    | 7                                                                          | 9                                     |
| V204F                    | 4                                                                          | 2                                     |
| Y54C                     | 5                                                                          | 5                                     |
| Y54S                     | 2                                                                          | 3                                     |
| Q299P                    | -                                                                          | -                                     |
| Y118H                    | 6                                                                          | 2                                     |
| A194S, F219S             | 637, 8                                                                     | 182, 4                                |
| D197Y                    | 18                                                                         | 17                                    |
| D295G                    | 3                                                                          | 2                                     |
| D295N                    | 3                                                                          | 1                                     |
| F219S                    | 8                                                                          | 4                                     |
| G138S                    | 12                                                                         | 3                                     |
| L208W                    | 2                                                                          | 1                                     |
| N203D                    | 21                                                                         | 26                                    |
| N203H                    | 3                                                                          | 5                                     |
| N203K                    | 11                                                                         | 25                                    |
| N203S                    | 31                                                                         | 16                                    |
| Q192R                    | 1                                                                          | 35                                    |
| Q299K                    | 4                                                                          | 3                                     |
| R298G                    | 260                                                                        | 16                                    |
| C128Y, V202F             | 8, 27                                                                      | 3, 8                                  |
| V296G                    | 2                                                                          | -                                     |
| T98I                     | 7                                                                          | 14                                    |
| P99L                     | 136                                                                        | 28                                    |
| Q127R, Q299K             | 4, 4                                                                       | 6, 3                                  |
| F305L                    | 88                                                                         | 18                                    |
| I200T, N203K             | 5, 11                                                                      | 6, 25                                 |
| V204F                    | 4                                                                          | 2                                     |
| G2V, Y126F, D295Y        | 7, 46, 5                                                                   | 5, 33, 2                              |
| D216Y                    | 85                                                                         | 17                                    |
| L141F                    | 22                                                                         | 12                                    |
| L32I, H80P, D216G, R222Q | 177, 3, 8, 198                                                             | 36, 4, 5, 201                         |

**Table S4: Nirmatrelvir half-maximal inhibitor concentration (IC<sub>50</sub>) values of 3CL<sup>pro</sup>-On and -Off wild-type and mutant variants.**

| Wild-type versus Y54C and L167F     |                                                 |                               |                                                  |                               |
|-------------------------------------|-------------------------------------------------|-------------------------------|--------------------------------------------------|-------------------------------|
|                                     | 3CL <sup>pro</sup> -On<br>IC <sub>50</sub> (μM) | Fold<br>change<br>(versus wt) | 3CL <sup>pro</sup> -Off<br>IC <sub>50</sub> (μM) | Fold<br>change<br>(versus wt) |
| Wild-type                           | 4.57 (3.77 - 5.60)                              | 1                             | 0.38 (0.30 - 0.53)                               | 1                             |
| Y54C                                | 22.62 (19.07 - 28.52)                           | 5                             | 1.00 (0.83 - 1.29)                               | 2.6                           |
| L167F                               | 31.92 (25.10 to 79.17)                          | 7                             | 1.40 (1.15 to 1.75)                              | 3.6                           |
| Omicron (O) versus O+Y54C; O+L167F  |                                                 |                               |                                                  |                               |
|                                     | 3CL <sup>pro</sup> -On<br>IC <sub>50</sub> (μM) | Fold<br>change<br>(versus wt) | 3CL <sup>pro</sup> -Off<br>IC <sub>50</sub> (μM) | Fold<br>change<br>(versus wt) |
| Wild-type                           | 11.81 (9.52 - 15.63)                            | 1                             | 0.18 (0.16 - 0.23)                               | 1                             |
| O+Y54C                              | 37.75 (43.09 - 109.70)                          | 3.2                           | 2.95 (2.57 - 3.60)                               | 16.5                          |
| O+L167F                             | 58.31 (29.73 - 55.04)                           | 5                             | 1.49 (1.33 - 1.69)                               | 8.3                           |
| Wild-type versus L167F; L167F+F305L |                                                 |                               |                                                  |                               |
|                                     | 3CL <sup>pro</sup> -On<br>IC <sub>50</sub> (μM) | Fold<br>change<br>(versus wt) | 3CL <sup>pro</sup> -Off<br>IC <sub>50</sub> (μM) | Fold<br>change<br>(versus wt) |
| Wild-type                           | 2.68 (2.26 - 3.21)                              | 1                             | 0.41 (0.36 - 0.52)                               | 1                             |
| L167F                               | 20.08 (18.36 - 22.05)                           | 7.5                           | 1.43 (1.20 - 1.61)                               | 3.5                           |
| L167F/F305L                         | 36.36 (30.63 - 49.48)                           | 13.5                          | 3.77 (2.94 - 4.97)                               | 9.2                           |
| Wild-type versus Q192R; Q192R/F305L |                                                 |                               |                                                  |                               |
|                                     | 3CL <sup>pro</sup> -On<br>IC <sub>50</sub> (μM) | Fold<br>change<br>(versus wt) | 3CL <sup>pro</sup> -Off<br>IC <sub>50</sub> (μM) | Fold<br>change<br>(versus wt) |
| Wild-type                           | 4.01 (3.71 - 4.35)                              | 1                             | 0.79 (0.71 - 0.97)                               | 1                             |
| Q192R                               | 118.4 (39.20 - to high)                         | 29.5                          | 5.36 (4.52 - 6.78)                               | 5.9                           |
| Q192R/F305L                         | 141.7 (59.20 - to high)                         | 35.3                          | 12.5 (10.18 - 16.22)                             | 12.5                          |
| Wild-type versus A194S; G138S       |                                                 |                               |                                                  |                               |
|                                     | 3CL <sup>pro</sup> -On<br>IC <sub>50</sub> (μM) | Fold<br>change<br>(versus wt) | 3CL <sup>pro</sup> -Off<br>IC <sub>50</sub> (μM) | Fold<br>change<br>(versus wt) |
| Wild-type                           | 11.38 (9.95 - 13.25)                            | 1                             | 0.10 (0.09 - 0.16)                               | 1                             |
| A194S                               | 37.82 (30.40 - 55.11)                           | 3.3                           | 0.49 (0.43 - 0.65)                               | 4.9                           |
| G138S                               | 39.3 (25.03 - 124.80)                           | 3.5                           | 0.27 (0.22 - 0.31)                               | 2.7                           |

**Table S5: GC376 IC<sub>50</sub> values of 3CL<sup>pro</sup>-On wild-type and mutant variants.**

| Wild-type versus Y54C; L167F        |                                                 |                            |
|-------------------------------------|-------------------------------------------------|----------------------------|
|                                     | 3CL <sup>pro</sup> -On<br>IC <sub>50</sub> (μM) | Fold change<br>(versus wt) |
| Wild-type                           | 9.74 (7.98 - 12.37)                             | 1                          |
| L167F                               | 28.54 (26.70 - 30.98)                           | 2.9                        |
| Y54C                                | 34.74 (29.98 - 47.20)                           | 3.7                        |
| Wild-type versus Q192R; Q192R/F305L |                                                 |                            |
|                                     | 3CL <sup>pro</sup> -On<br>IC <sub>50</sub> (μM) | Fold change<br>(versus wt) |
| Wild-type                           | 9.38 (8.44 - 10.46)                             | 1                          |
| Q192R                               | 24.43 (19.31 - 34.90)                           | 2.6                        |
| Wild-type versus A194S; G138S       |                                                 |                            |
|                                     | 3CL <sup>pro</sup> -On<br>IC <sub>50</sub> (μM) | Fold change<br>(versus wt) |
| Wild-type                           | 12.62 (11.05 - 14.69)                           | 1                          |
| A194S                               | 21.99 (19.50 - 25.62)                           | 1.7                        |
| G138S                               | 18.99 (15.12 - 26.56)                           | 1.5                        |

**Table S6: Half maximal effective concentration (EC<sub>50</sub>) values of 3CL<sup>pro</sup>-On wild-type and mutant variants as measured by flow cytometry.**

| Wild-type versus L167F; L167F/F305L (with FACS) |                                                 |                            |
|-------------------------------------------------|-------------------------------------------------|----------------------------|
|                                                 | 3CL <sup>pro</sup> -On<br>EC <sub>50</sub> (μM) | Fold change<br>(versus wt) |
| Wild-type                                       | 0.91 (0.70 - 1.19)                              | 1                          |
| L167F                                           | 3.53 (2.39 - 5.22)                              | 3.8                        |
| L167F/F305L                                     | 11.07 (9.35 - 13.10)                            | 12.5                       |

**Table S7: Two-fold change (2FC) for nirmatrelvir, ensitrelvir, and GC376.**

|           | Nirmatrelvir<br>2FC (nM) | Fold change<br>(versus wt) | Ensitrelvir<br>2FC (nM) | Fold change<br>(versus wt) | GC376<br>2FC (nM) | Fold change<br>(versus wt) |
|-----------|--------------------------|----------------------------|-------------------------|----------------------------|-------------------|----------------------------|
| Wild-type | 11.4                     | 1                          | 17.1                    | 1                          | 145.3             | 1                          |
| L167F     | 96.2                     | 8.5                        | 284.3                   | 16.6                       | 570.2             | 3.9                        |

**Table S8: Ensitrelvir IC<sub>50</sub> values of 3CL<sup>pro</sup>-On wild-type and mutant variants.**

|           | Ensitrelvir<br>IC <sub>50</sub> (μM) | Fold change<br>(versus wt) |
|-----------|--------------------------------------|----------------------------|
| Wild-type | 8.0 (6.95 - 9.36)                    | 1                          |
| Y54C      | 25.0 (22.37 - 27.99)                 | 3.1                        |
| L167F     | 41.6 (n.a. - 230.80)                 | 5.2                        |
| Q192R     | 25.5 (17.88 - 53.94)                 | 3.2                        |

**Table S9: Enzyme kinetics metrics of wt 3CL<sup>pro</sup> and mutants with the substrate Ac-Abu-Tle-Leu-Gln↓MCA. V<sub>max</sub>, maximal reaction rate; RFU, relative fluorescent units; K<sub>m</sub>, Michaelis-Menten constant; k<sub>cat</sub>, catalytic constant or turnover number.**

|                                       | wt                      | Y54C                    | L167F                   | Q192R                   |
|---------------------------------------|-------------------------|-------------------------|-------------------------|-------------------------|
| V <sub>max</sub> (RFU/min)            | 1.71                    | 1.31                    | 1.75                    | 1.03                    |
| K <sub>m</sub>                        | 80.6                    | 108.5                   | 134.1                   | 163.3                   |
| k <sub>cat</sub> (min <sup>-1</sup> ) | 0.017                   | 0.013                   | 0.018                   | 0.010                   |
| k <sub>cat</sub> /K <sub>m</sub>      | 1.78 x 10 <sup>-4</sup> | 1.21 x 10 <sup>-4</sup> | 1.31 x 10 <sup>-4</sup> | 0.63 x 10 <sup>-4</sup> |

**Table S10: Nirmatrelvir IC<sub>50</sub> values obtained from Fluorescence Resonance Energy Transfer (FRET) assays.**

|           | Nirmatrelvir<br>IC <sub>50</sub> (μM) | Fold change<br>(versus wt) |
|-----------|---------------------------------------|----------------------------|
| Wild-type | 0.085 (0.06 - 0.12)                   | 1                          |
| Y54C      | 0.26 (0.19 - 0.40)                    | 3                          |
| L167F     | 0.38 (0.23 - 0.85)                    | 4.5                        |
| Q192R     | 0.43 (0.33 - 0.59)                    | 5                          |

**Table S11: Nirmatrelvir IC<sub>50</sub> values obtained from recombinant SARS-CoV-2-mCherry.**

|             | Nirmatrelvir<br>IC <sub>50</sub> (nM) 48 hpi | Fold change<br>(versus wt) | Nirmatrelvir<br>IC <sub>50</sub> (nM) 72 hpi | Fold change<br>(versus wt) |
|-------------|----------------------------------------------|----------------------------|----------------------------------------------|----------------------------|
| Wild-type   | 8.68 (7.85 - 9.61)                           | 1                          | 8.51 (7.68 - 9.44)                           | 1                          |
| L167F       | 16.24 (14.31 - 18.42)                        | 1.9                        | 20.05 (17.71 - 22.70)                        | 2.4                        |
| L167F F305L | 20.07 (17.69 - 22.75)                        | 2.3                        | 23.10 (19.75 - 26.97)                        | 2.7                        |

**Table S12: cloning primer for VSV vectors.**

| Name                | Sequence (5'-3' direction)                                  |
|---------------------|-------------------------------------------------------------|
| 33n-before-KpnI-for | GAACCGGTCCTGCTTTTCACC                                       |
| G-cut1-rev          | CATTTTTCTAAAACCACTCTGCAAAACAGCTGAGGTGATCTTTCCA<br>AGTCGGTTC |
| cut1-for            | ATCACCTCAGCTGTTTTGCAG                                       |
| cut2-L-rev          | GTCGGTCTCAAAATCGTGGACTTCCATGATTGTTCTTTTCACTGCAC<br>TTTG     |
| cut2-L-for          | AGTGCAGTGAAAAGAACAATCATGGAAGTCCACGATTTTGAG                  |
| 33n-after-HpaI-rev  | GATGTTGGGATGGGATTGGC                                        |

**Table S13: cloning primer for 3CL<sup>pro</sup>-Off and -On mutant variants.**

| Name                          | Sequence (5'-3' direction)                                    |
|-------------------------------|---------------------------------------------------------------|
| blasticidin-for               | CATTCGATTAGTGAACGGATCTC                                       |
| 3CL <sup>pro</sup> -L167F-for | GCACCATATGGAATTTCCAACCTG                                      |
| 3CL <sup>pro</sup> -L167F-rev | CATGAACTCCAGTTGGAAATTCC                                       |
| 3CL <sup>pro</sup> -Y54C-for  | CATGCTTAACCCTAATTGTGAAGATTTACTC                               |
| 3CL <sup>pro</sup> -Y54C-rev  | CTTACGAATGAGTAAATCTTCACAATTAGGG                               |
| 3CL <sup>pro</sup> -F305L-for | GCTCAGGTGTTACTCTCCAAAG                                        |
| 3CL <sup>pro</sup> -F305L-rev | CACTGCACTTTGGAGAGTAACAC                                       |
| 3CL <sup>pro</sup> -Q192R-for | GTTGACAGGCAAACAGCACGAGCAGCTG                                  |
| 3CL <sup>pro</sup> -Q192R-rev | GTCCGTACCAGCTGCTCGTGCTGTTTG                                   |
| Omicron-for                   | CAATGTGCTATGAGGCACAATTTAC                                     |
| Omicron-rev                   | CTTAATAGTGAAATTGTGCCTCATAGC                                   |
| 3CL <sup>pro</sup> -A194S-for | CAAACAGCACAAGCATCTGGTACG                                      |
| 3CL <sup>pro</sup> -A194S-rev | GTGTCCGTACCAGATGCTTGTGC                                       |
| 3CL <sup>pro</sup> -G138S-for | CCCAATTTCACTATTAAGAGTTCATTCCTTAATG                            |
| 3CL <sup>pro</sup> -G138S-rev | ACCACATGAACCATTAAGGAATGAACTCTTAATA                            |
| hygro-P-for                   | CTGTTTTGACCTCCATAGAAGATTCTAGAGCTAGCATGGATAATCT<br>CACAAAAGTTC |
| P-hygro-rev                   | GAGGGAGAGGGGCGGATCCCCTTAATTAACACTACAGAGAATATTTG<br>ACTCTCGC   |

**Data file S1: Sequence for SARS-CoV-2-mCherry.** The non-annotated sequence of unmodified rWA1 SARS-CoV-2-mCherry is provided in the standard fasta (.fasta) format.

**Data file S2: Accession numbers for SARS-CoV-2 mutants introduced into SARS-CoV-mCherry.** Accession identifiers (IDs), collection and submission dates and location from the GISAID database are provided for L167F and F305L mutants.

**Data file S3: Raw, individual-level data for experiments where  $n < 20$ .** The file provides raw and normalized data for all figures, which contain graphs generated in GraphPad Prism.

**Data file S4: Sequence for VSV-3CL<sup>pro</sup>.** The annotated sequence of VSV-3CL<sup>pro</sup> is provided in the standard GenBank (.gb) format.
